# Supplementary material
Source: Springer Nature journal article supplement (https://www.springermedizin.de/resource/supplementary/12916_2010_367_MOESM4_ESM.pdf/9599800)

# MUC4: total 5284 a.a.

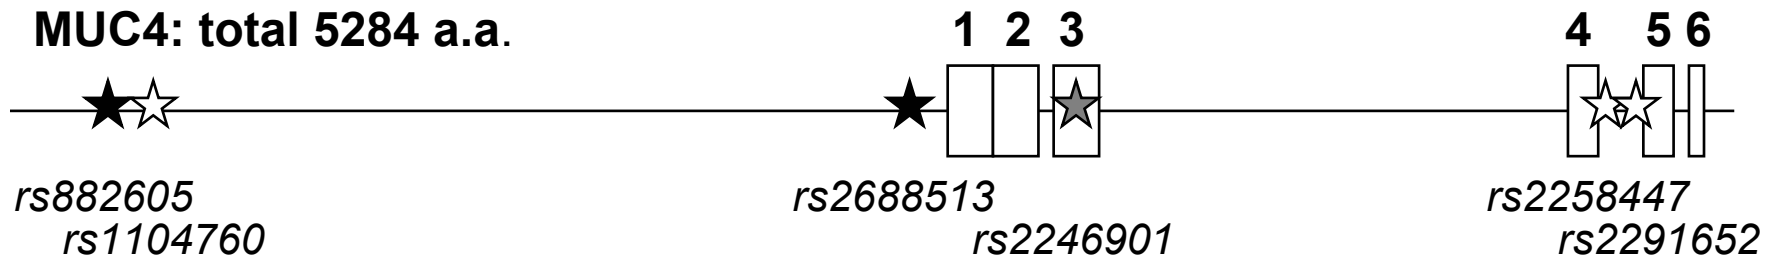

1. 4269-4424  
2. 4425-4540  
3. 4553-4788

NIDO  
AMOP  
VWFD

4. 4990-5029  
5. 5193-5232  
6. 5241-5261

EGF\_3  
EGF\_3  
transmembrane

## 251 a.a. ~ 400 a.a.

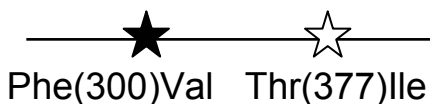

300-FDPEGQSPATFSRTSTQDDT-319

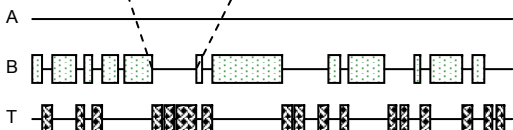

## 4001 a.a. ~ 4200 a.a.

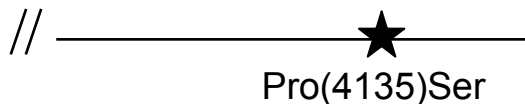

4134-TPGMTT<sup>P</sup>SLKTDGGRRTATSPPTT-4158

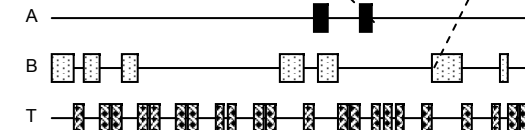

## 4601 a.a. ~ 4800 a.a.

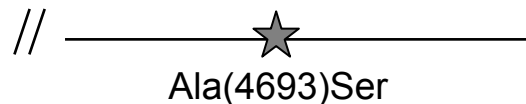

4601-TPGMTT<sup>P</sup>SLKTDGGRRTATSPPTT-4800

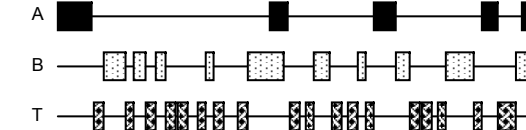

**MUC4  
sequence**

■  $\alpha$ -helix  
▨  $\beta$ -strand  
▩ turn/loop

▨ hydrophilicity

▨ surface probability

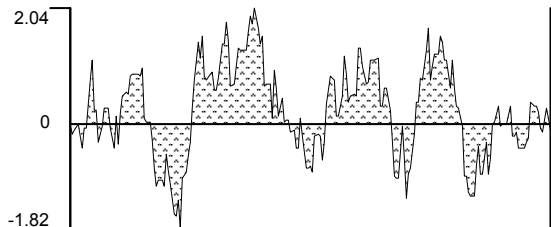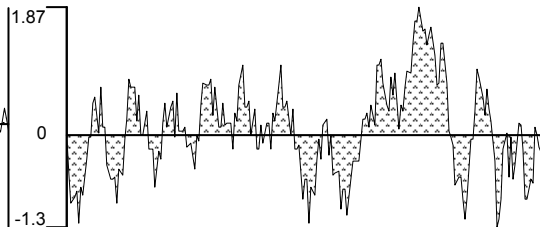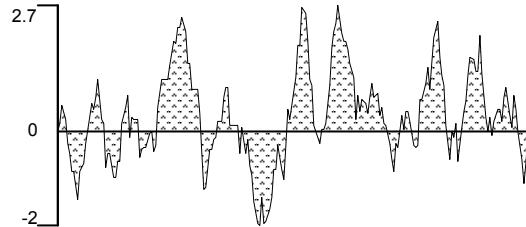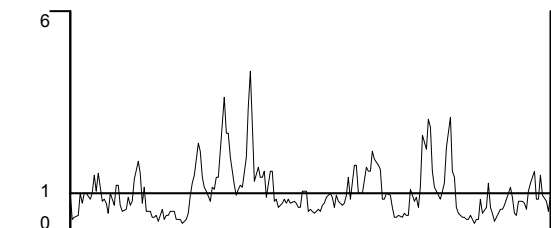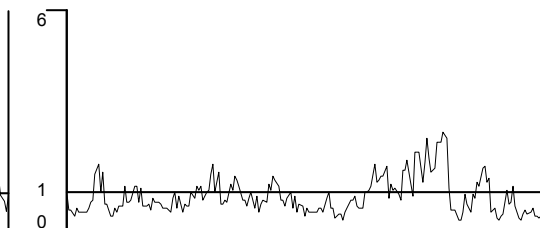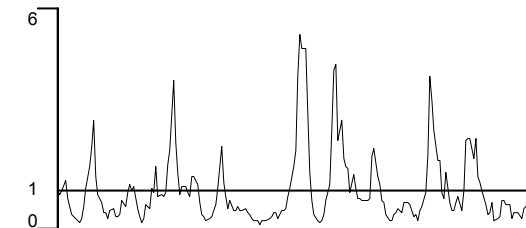

Supplement: MOESM4 [file 9599800]
